# Supplementary material
Source: PubMed Central journal article supplement (PMC5933846)

Figure 2b

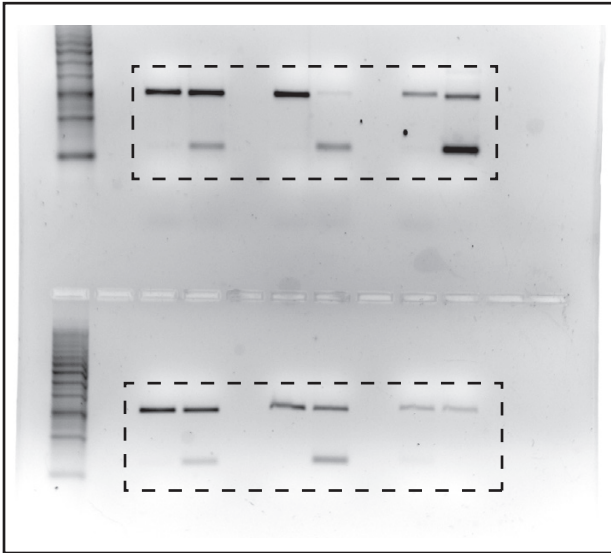

Extended data Figure 3

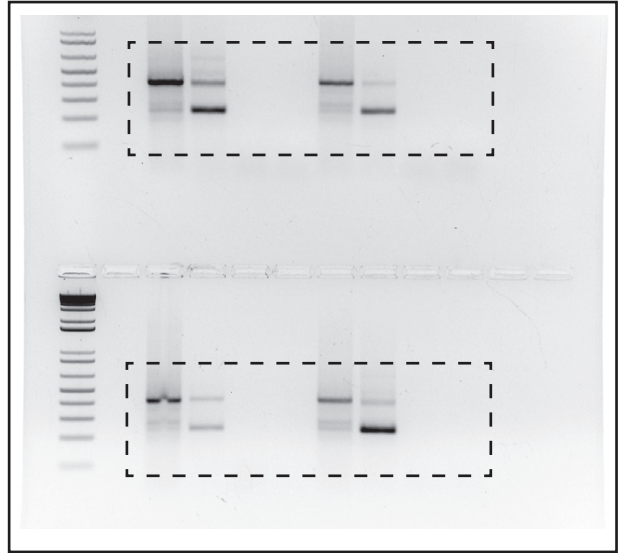

Extended data Figure 5a

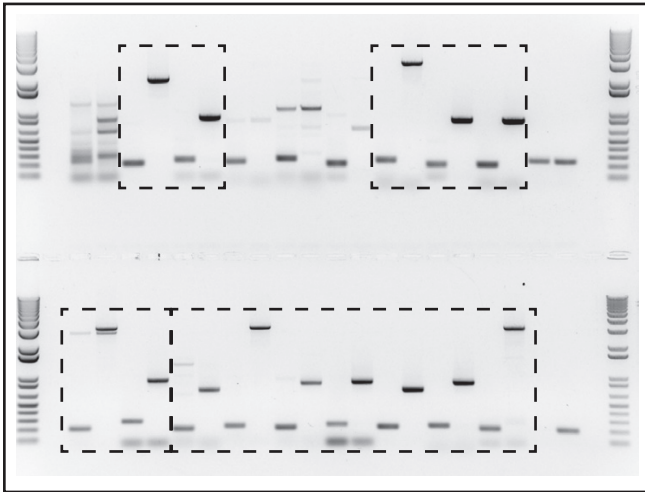

Extended data Figure 5a

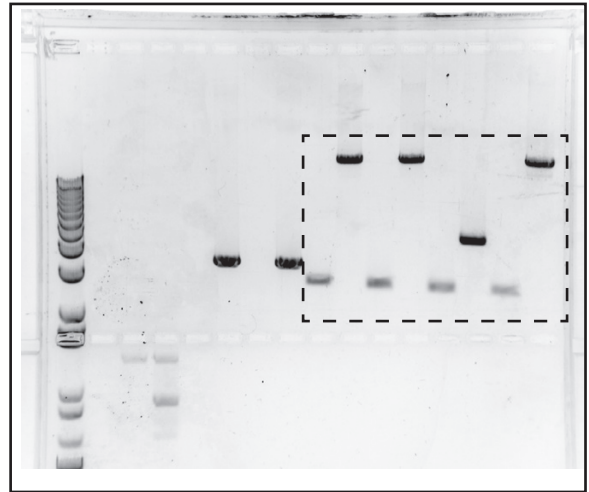

Extended data Figure 5a

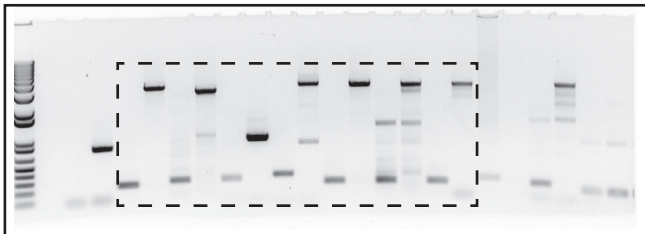

Extended data Figure 6d

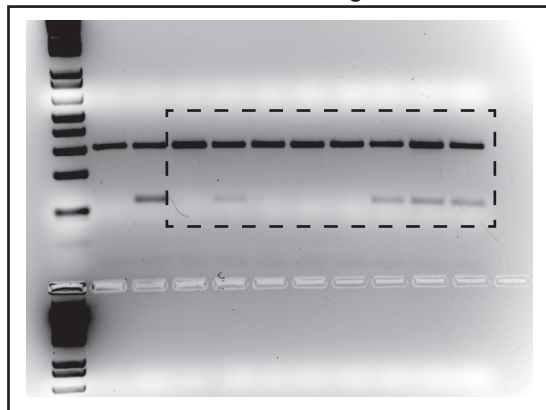

Supplement: NIHMS918507-supplement-2.pdf [file NIHMS918507-supplement-2.pdf]
